# Supplementary material
Source: Springer Nature journal article supplement (https://www.springermedizin.de/resource/supplementary/13014_2008_131_MOESM5_ESM.pdf/9632972)

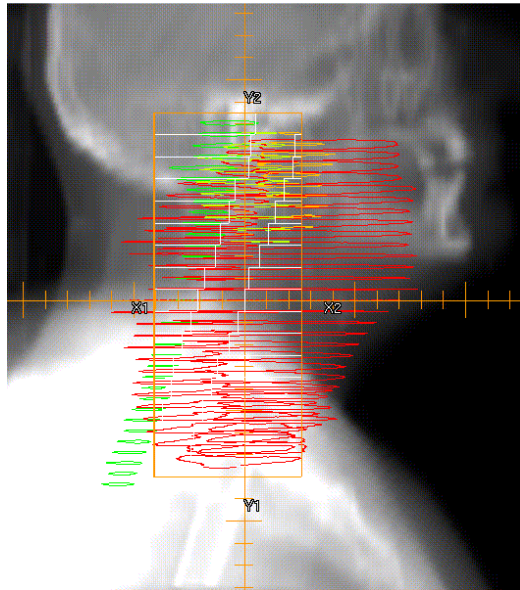

IMRT

DMPO-50

2-Step IMRT

2S-DMPO-50

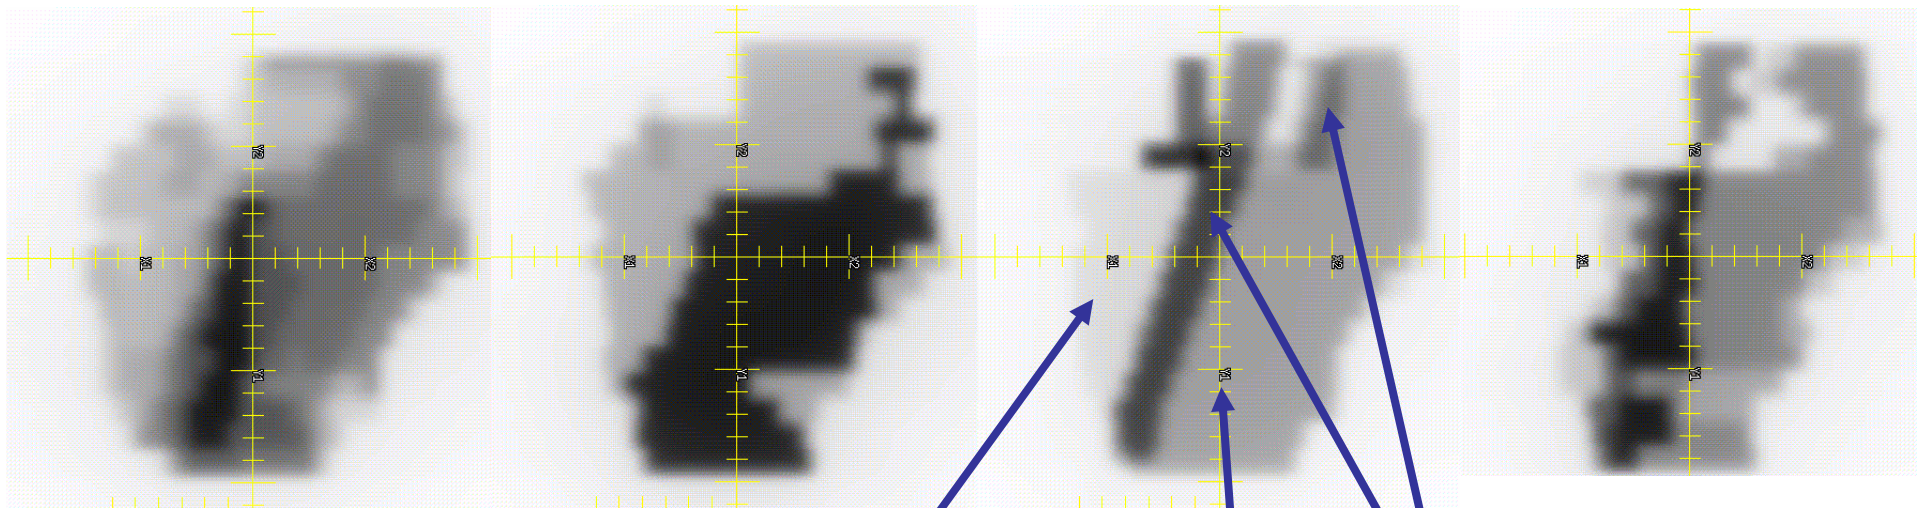

153

52

53

53 segments

Level 0

1

2

Supplement: MOESM5 [file 9632972]
